# Supplementary material for: Biologic Data of Cynomolgus Monkeys Maintained under Laboratory Conditions
Source: PubMed Central journal article supplement (PMC4900550; doi:10.1371/journal.pone.0157003), 2016-06-09
Supplement: pone.0157003.s001.pdf [file pone.0157003.s001.pdf]

|                                      | Female (n=119)<br>Avg ± SD | Male (n=119)<br>Avg ± SD | FC    | p-value |
|--------------------------------------|----------------------------|--------------------------|-------|---------|
| <b>Alkaline phosphatase (U/L)</b>    | 447.88 ± 144.02            | 647.07 ± 203.93          | -0.53 | < 0.001 |
| <b>Gamma Globulin (%)</b>            | 17.39 ± 2.98               | 15.04 ± 2.76             | 0.21  | < 0.001 |
| <b>GGT (U/L)</b>                     | 65.71 ± 22.18              | 83.31 ± 26.30            | -0.34 | < 0.001 |
| <b>Chloride (mmol/L)</b>             | 109.13 ± 2.79              | 107.12 ± 2.63            | 0.03  | < 0.001 |
| <b>Inorganic Phosphorus (mmol/L)</b> | 2.42 ± 1.30                | 2.73 ± 1.40              | -0.17 | < 0.001 |
| <b>A/G ratio</b>                     | 1.10 ± 0.14                | 1.23 ± 0.87              | -0.14 | < 0.001 |
| <b>Albumin (%)</b>                   | 51.53 ± 3.01               | 53.26 ± 3.25             | -0.05 | < 0.001 |
| <b>Potassium (mmol/L)</b>            | 5.38 ± 0.76                | 5.66 ± 0.76              | -0.07 | < 0.01  |
| <b>AST (U/L)</b>                     | 40.73 ± 16.19              | 42.62 ± 11.75            | -0.07 | < 0.01  |
| Total Bilirubin (µmol/L)             | 4.82 ± 1.78                | 4.49 ± 1.48              | 0.10  | 0.10    |
| Alpha 1 Globulin (%)                 | 5.03 ± 0.74                | 4.95 ± 0.78              | 0.02  | 0.13    |
| Beta globulin (%)                    | 18.09 ± 2.97               | 18.81 ± 3.31             | -0.06 | 0.14    |
| SGPT/ALT (U/L)                       | 51.19 ± 23.61              | 48.58 ± 26.64            | 0.08  | 0.16    |
| C-Reactive protein (mg/L)            | 1.32 ± 1.63                | 1.38 ± 1.44              | -0.06 | 0.26    |
| Creatinine (µmol/L)                  | 75.66 ± 8.35               | 76.10 ± 10.98            | -0.01 | 0.46    |
| Sodium (mmol/L)                      | 150.71 ± 3.29              | 150.53 ± 3.63            | 0.00  | 0.50    |
| Glutamate Dehydrogenase (U/L)        | 29.29 ± 22.54              | 26.71 ± 16.90            | 0.13  | 0.54    |
| Urea (mmol/L)                        | 7.59 ± 1.89                | 7.60 ± 1.78              | 0.00  | 0.63    |
| Triglycerides (mmol/L)               | 0.56 ± 0.24                | 0.54 ± 0.22              | 0.05  | 0.76    |
| Glucose (mmol/L)                     | 3.79 ± 0.87                | 3.75 ± 0.78              | 0.02  | 0.79    |
| Alpha 2 Globulin (%)                 | 8.02 ± 2.41                | 7.92 ± 2.44              | 0.02  | 0.79    |
| Total protein (g/L)                  | 82.57 ± 4.87               | 75.37 ± 5.01             | 0.13  | 0.82    |
| Calcium (mmol/L)                     | 3.58 ± 2.66                | 3.54 ± 2.64              | 0.02  | 0.86    |
| Total Cholesterol (mmol/L)           | 4.04 ± 0.81                | 4.08 ± 0.90              | -0.01 | 0.92    |

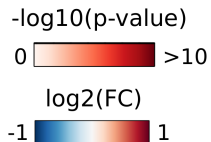

|                                          | Female (n=118)<br>Avg ± SD | Male (n=118)<br>Avg ± SD | FC    | p-value |
|------------------------------------------|----------------------------|--------------------------|-------|---------|
| <b>N/L</b>                               | 1.50 ± 1.09                | 0.78 ± 0.52              | 0.94  | < 0.001 |
| <b>NEU Neutrophils (%)</b>               | 50.92 ± 14.74              | 37.98 ± 13.77            | 0.42  | < 0.001 |
| <b>LYMPH Lymphocytes (%)</b>             | 44.39 ± 14.04              | 56.66 ± 13.33            | -0.35 | < 0.001 |
| <b>Neutrophils (10E3 cells/mcL)</b>      | 7.05 ± 3.63                | 4.95 ± 2.28              | 0.51  | < 0.001 |
| <b>Lymphocytes (10E3 cells/mcL)</b>      | 5.71 ± 2.32                | 7.55 ± 3.40              | -0.40 | < 0.001 |
| <b>HGB Hemoglobin(g/dL)</b>              | 13.71 ± 0.94               | 14.02 ± 1.44             | -0.03 | < 0.001 |
| <b>MONO Monocytes (%)</b>                | 2.91 ± 1.09                | 3.46 ± 1.20              | -0.25 | < 0.001 |
| <b>Monocytes (10E3 cells/mcL)</b>        | 0.37 ± 0.18                | 0.45 ± 0.21              | -0.28 | < 0.01  |
| <b>Large Unstained Cells (%)</b>         | 0.74 ± 0.35                | 0.83 ± 0.38              | -0.17 | < 0.05  |
| <b>BASO Basophilis (%)</b>               | 0.37 ± 0.10                | 0.41 ± 0.13              | -0.15 | < 0.05  |
| <b>HCT Hematocrit(%)</b>                 | 46.34 ± 3.78               | 47.27 ± 3.52             | -0.03 | < 0.05  |
| <b>RBC Erythrocytes (10E6 cells/mcL)</b> | 5.93 ± 0.45                | 6.06 ± 0.41              | -0.03 | < 0.05  |
| <b>MCHC (g/dL)</b>                       | 27.88 ± 3.26               | 28.31 ± 3.15             | -0.02 | < 0.05  |
| Basophilis (10 E3 cells/mcL)             | 0.05 ± 0.02                | 0.06 ± 0.04              | -0.26 | 0.08    |
| PLT Plateles (10E3 cells/mcL)            | 414.56 ± 82.63             | 407.52 ± 143.01          | 0.02  | 0.10    |
| RET Reticulocytes (10E9 cells/L)         | 56.37 ± 19.82              | 63.24 ± 33.14            | -0.17 | 0.28    |
| Prothrombin Time (sec)                   | 12.59 ± 1.19               | 12.39 ± 0.84             | 0.02  | 0.30    |
| Reticulocytes (%)                        | 0.95 ± 0.34                | 1.01 ± 0.62              | -0.09 | 0.34    |
| EOS Eosinophilis (%)                     | 0.66 ± 0.65                | 0.63 ± 0.50              | 0.07  | 0.44    |
| Act. partial Thromboplastin Time (sec)   | 17.85 ± 1.96               | 17.66 ± 1.95             | 0.02  | 0.49    |
| MCH (pg)                                 | 24.87 ± 2.97               | 25.04 ± 2.99             | -0.01 | 0.74    |
| Eosinophilis (10E3 cells/mcL)            | 0.09 ± 0.10                | 0.09 ± 0.10              | 0.00  | 0.84    |
| MCV Means Corpuscular Volume (fL)        | 78.19 ± 3.90               | 78.09 ± 3.78             | 0.00  | 0.84    |
| WBC Leukocytes (10E3 cells/mcL)          | 12.97 ± 3.40               | 13.21 ± 4.12             | -0.03 | 0.92    |
