# Supplementary material for: Biologic Data of Cynomolgus Monkeys Maintained under Laboratory Conditions
Source: PubMed Central journal article supplement (PMC4900550; doi:10.1371/journal.pone.0157003), 2016-06-09

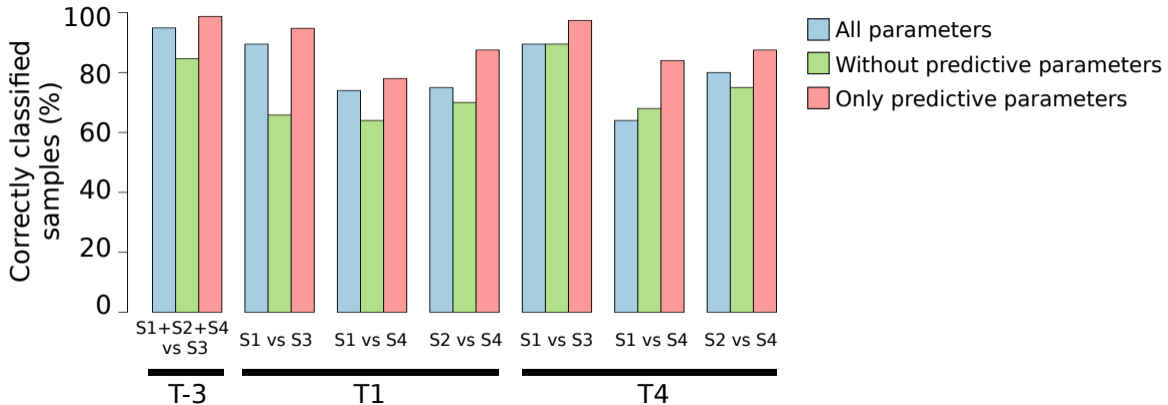

Supplement: pone.0157003.s002.pdf [file pone.0157003.s002.pdf]
