# Supplementary material for: Biologic Data of Cynomolgus Monkeys Maintained under Laboratory Conditions
Source: PubMed Central journal article supplement (PMC4900550; doi:10.1371/journal.pone.0157003), 2016-06-09
Supplement: pone.0157003.s003.pdf [file pone.0157003.s003.pdf]

**B cells (%)**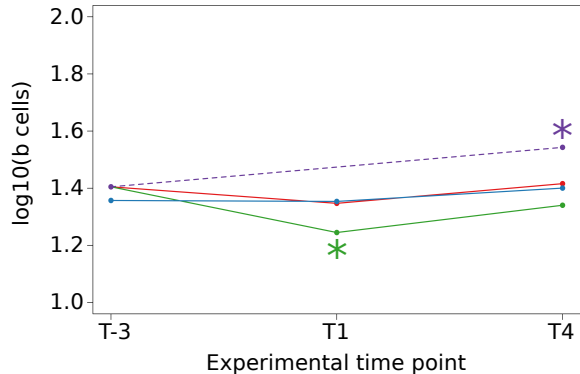

| Study | B cells (%) - n° samples |    |    |
|-------|--------------------------|----|----|
|       | T-3                      | T1 | T4 |
| S1    | 10                       | 10 | 10 |
| S2    | 9                        | 10 | 10 |
| S3    | 8                        | 8  | 8  |
| S4    | 10                       | 0  | 10 |

**Alpha 1 Globulin (%)**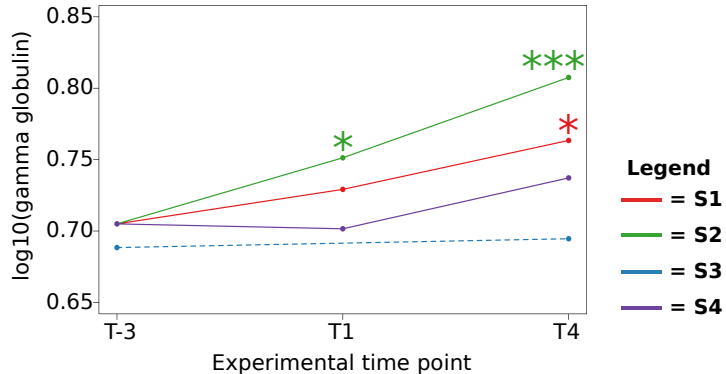

| Study | Alpha 1 Globulin (%) - n° samples |    |    |
|-------|-----------------------------------|----|----|
|       | T-3                               | T1 | T4 |
| S1    | 30                                | 30 | 20 |
| S2    | 20                                | 20 | 20 |
| S3    | 8                                 | 0  | 8  |
| S4    | 20                                | 10 | 20 |
